# Supplementary material for: The Social Representations of Zoo Goers toward Crocodiles and Turtles: Structural Analysis and Implications for Conservation
Source: MDPI journal article supplement (doi:10.3390/socsci11120571), 2022-12-05
Supplement: s1 [file s1]

**Table S1** – Candidates for the central nucleus and 1<sup>st</sup> periphery for the stimulus word “crocodile”

| Frequency $\geq 8$<br>Mean Order $< 2.6$ | Frequency | Order | Frequency $\geq 8$<br>Mean Order $\geq 2.6$ | Frequency | Order |
|------------------------------------------|-----------|-------|---------------------------------------------|-----------|-------|
| <u>Central Nucleus</u>                   |           |       | <u>1<sup>st</sup> Periphery</u>             |           |       |
| Danger                                   | 63        | 2.0   | Teeth                                       | 114       | 3.4   |
|                                          |           |       | Fear                                        | 60        | 2.9   |
|                                          |           |       | Big                                         | 54        | 3.9   |
|                                          |           |       | Color                                       | 51        | 4.7   |
|                                          |           |       | Habitat                                     | 48        | 4.7   |
|                                          |           |       | Water                                       | 43        | 4.3   |
|                                          |           |       | Scale                                       | 38        | 4.7   |
|                                          |           |       | Artifact                                    | 38        | 5.5   |
|                                          |           |       | Predator                                    | 34        | 3.6   |
|                                          |           |       | Reptile                                     | 33        | 3.5   |
|                                          |           |       | Distribution                                | 29        | 4.7   |
|                                          |           |       | Strong                                      | 27        | 3.3   |
|                                          |           |       | Fast                                        | 26        | 4.1   |
|                                          |           |       | Tail                                        | 23        | 5.5   |
|                                          |           |       | Ancestral                                   | 22        | 4.2   |
|                                          |           |       | Mouth                                       | 20        | 4.5   |
|                                          |           |       | Fierce                                      | 19        | 2.7   |
|                                          |           |       | Carnivore                                   | 16        | 4.9   |
|                                          |           |       | Wild                                        | 13        | 3.2   |
|                                          |           |       | Species                                     | 13        | 4.3   |
|                                          |           |       | Skin                                        | 13        | 4.7   |
|                                          |           |       | Eyes                                        | 12        | 5.7   |
|                                          |           |       | Aggressive                                  | 11        | 2.7   |
|                                          |           |       | Lively                                      | 11        | 3.4   |

|                                                       |                  |              |                                                        |                  |              |
|-------------------------------------------------------|------------------|--------------|--------------------------------------------------------|------------------|--------------|
|                                                       |                  |              | Death                                                  | 11               | 4.4          |
|                                                       |                  |              | Movies                                                 | 11               | 4.7          |
|                                                       |                  |              | Evil                                                   | 10               | 3.3          |
|                                                       |                  |              | Dinosaur                                               | 10               | 5.7          |
|                                                       |                  |              | Bite                                                   | 9                | 3.4          |
|                                                       |                  |              | Ugly                                                   | 8                | 5.2          |
|                                                       |                  |              | Slippery                                               | 8                | 5.5          |
| <b>Frequency &lt; 8</b><br><b>Mean Order &lt; 2.6</b> | <b>Frequency</b> | <b>Order</b> | <b>Frequency &lt; 8</b><br><b>Mean Order &gt;= 2.6</b> | <b>Frequency</b> | <b>Order</b> |
| <u>Contrast zone</u>                                  |                  |              | <u>2<sup>nd</sup> Periphery</u>                        |                  |              |
| Intelligent                                           | 4                | 2.5          | Power                                                  | 7                | 2.7          |
|                                                       |                  |              | Assassin                                               | 7                | 3.4          |
|                                                       |                  |              | Claws                                                  | 7                | 5.4          |
|                                                       |                  |              | Hungry                                                 | 7                | 6.4          |
|                                                       |                  |              | Camouflage                                             | 6                | 3.7          |
|                                                       |                  |              | Respect                                                | 6                | 4.0          |
|                                                       |                  |              | Swim                                                   | 6                | 6.3          |
|                                                       |                  |              | Greedy                                                 | 5                | 3.4          |
|                                                       |                  |              | Steve Irwin                                            | 5                | 4.8          |
|                                                       |                  |              | Eat                                                    | 5                | 5.4          |
|                                                       |                  |              | Sleep                                                  | 5                | 5.6          |
|                                                       |                  |              | Hard                                                   | 5                | 5.6          |
|                                                       |                  |              | Patient                                                | 4                | 3.5          |
|                                                       |                  |              | Crawler                                                | 4                | 4.0          |
|                                                       |                  |              | Beautiful                                              | 4                | 4.3          |
|                                                       |                  |              | Ambush                                                 | 4                | 5.0          |
|                                                       |                  |              | Aquarium                                               | 4                | 5.3          |

|  |  |  |         |   |     |
|--|--|--|---------|---|-----|
|  |  |  | Lacoste | 4 | 5.5 |
|  |  |  | Eggs    | 4 | 6.5 |
|  |  |  | Rough   | 4 | 7.0 |
