# Supplementary material for: The Social Representations of Zoo Goers toward Crocodiles and Turtles: Structural Analysis and Implications for Conservation
Source: MDPI journal article supplement (doi:10.3390/socsci11120571), 2022-12-05
Supplement: s1 [file s1]

**Table S2** – Candidates for the central nucleus and 1<sup>st</sup> periphery for the stimulus word “turtle”

| Frequency $\geq 9$<br>Mean Order $< 2.6$ | Frequency | Order | Frequency $\geq 9$<br>Mean Order $\geq 2.6$ | Frequency | Order |
|------------------------------------------|-----------|-------|---------------------------------------------|-----------|-------|
| <u>Central Nucleus</u>                   |           |       | <u>1<sup>st</sup> Periphery</u>             |           |       |
| Longevity                                | 27        | 2.4   | Slow                                        | 116       | 3.2   |
| Gracious                                 | 10        | 2.5   | Shell                                       | 102       | 3.2   |
|                                          |           |       | Sea                                         | 79        | 3.2   |
|                                          |           |       | Color                                       | 49        | 4.4   |
|                                          |           |       | Ancestral                                   | 42        | 3.5   |
|                                          |           |       | Beautiful                                   | 41        | 3.4   |
|                                          |           |       | Serenity                                    | 37        | 3.8   |
|                                          |           |       | Kind                                        | 30        | 3.6   |
|                                          |           |       | Swim                                        | 28        | 3.6   |
|                                          |           |       | Egg                                         | 26        | 4.8   |
|                                          |           |       | Preservation                                | 25        | 3.6   |
|                                          |           |       | Hard                                        | 24        | 4.1   |
|                                          |           |       | Movies                                      | 21        | 5.1   |
|                                          |           |       | Small                                       | 18        | 5.3   |
|                                          |           |       | Big                                         | 16        | 5.6   |
|                                          |           |       | Beach                                       | 14        | 4.4   |
|                                          |           |       | Friend                                      | 13        | 4.3   |
|                                          |           |       | Patient                                     | 12        | 4.3   |
|                                          |           |       | Aquarium                                    | 12        | 4.8   |
|                                          |           |       | Flipper                                     | 12        | 5.7   |
|                                          |           |       | Strong                                      | 11        | 3.5   |
|                                          |           |       | Lazy                                        | 11        | 4.3   |
|                                          |           |       | Wrinkled                                    | 11        | 6.9   |
|                                          |           |       | Intelligent                                 | 10        | 3.3   |

|                                                       |                  |              |                                                        |                  |              |
|-------------------------------------------------------|------------------|--------------|--------------------------------------------------------|------------------|--------------|
|                                                       |                  |              | Eat                                                    | 10               | 4.2          |
|                                                       |                  |              | Sand                                                   | 9                | 4.2          |
| <b>Frequency &lt; 9</b><br><b>Mean Order &lt; 2.6</b> | <b>Frequency</b> | <b>Order</b> | <b>Frequency &lt; 9</b><br><b>Mean Order &gt;= 2.6</b> | <b>Frequency</b> | <b>Order</b> |
| <u>Contrast zone</u>                                  |                  |              | <u>2<sup>nd</sup> Periphery</u>                        |                  |              |
|                                                       |                  |              | Hide                                                   | 8                | 4.0          |
|                                                       |                  |              | Region of the World                                    | 8                | 4.3          |
|                                                       |                  |              | Terrestrial                                            | 8                | 4.5          |
|                                                       |                  |              | Hibernate                                              | 8                | 5.1          |
|                                                       |                  |              | Wisdom                                                 | 7                | 2.7          |
|                                                       |                  |              | Sleep                                                  | 7                | 4.3          |
|                                                       |                  |              | Pet                                                    | 7                | 5.4          |
|                                                       |                  |              | Fish                                                   | 6                | 3.5          |
|                                                       |                  |              | Aquatic                                                | 6                | 4.3          |
|                                                       |                  |              | Fearful                                                | 6                | 4.8          |
|                                                       |                  |              | Pattern                                                | 6                | 6.2          |
|                                                       |                  |              | Reptile                                                | 5                | 3.2          |
|                                                       |                  |              | Tropical                                               | 5                | 3.2          |
|                                                       |                  |              | Shrimp                                                 | 5                | 3.6          |
|                                                       |                  |              | Funny                                                  | 5                | 3.6          |
|                                                       |                  |              | Heavy                                                  | 5                | 4.0          |
|                                                       |                  |              | Herbivore                                              | 5                | 4.8          |
|                                                       |                  |              | Lonely                                                 | 5                | 4.8          |
|                                                       |                  |              | Head                                                   | 5                | 5.4          |
|                                                       |                  |              | Hassle                                                 | 4                | 4.0          |
|                                                       |                  |              | Animal                                                 | 4                | 4.0          |
|                                                       |                  |              | Seaweed                                                | 4                | 4.5          |

|  |  |  |         |   |     |
|--|--|--|---------|---|-----|
|  |  |  | Fun     | 4 | 4.8 |
|  |  |  | Scale   | 4 | 4.8 |
|  |  |  | Lettuce | 4 | 6.0 |
